# Supplementary material for: Assessing the Anti-inflammatory Mechanism of Reduning Injection by Network Pharmacology
Source: Biomed Res Int. 2020 Dec 16;2020:6134098. doi: 10.1155/2020/6134098 (PMC7758122; doi:10.1155/2020/6134098)
Supplement: Supplementary Materials — Supplementary Table S1: targets gathered in PubChem, BindingDB, and TCMSP. Supplementary Table S2: network topological parameters of CTN. Supplementary Table S3: target-pathway relationships of potential targets of RDNI. Supplementary Table S4: network topological parameters of TPN. Supplementary Figure S1: HPLC spectra of RDNI at 237 nm (a) and 324 nm (b). [file 6134098.f1.docx]

**Assessing the anti-inflammatory mechanism of Reduning Injection by network pharmacology**

Fuda Xie,1,2 Mingxiang Xie,1,2 Yibing Yang,1,2 Miaomiao Zhang,3 Xiaojie Xu,4 Na Liu,1,2 Wei Xiao,5,* Jiangyong Gu1,2*

1Research Center of Integrative Medicine, School of Basic Medical Science, Guangzhou University of Chinese Medicine, Guangzhou 510006, China.

2Department of Biochemistry, School of Basic Medical Science, Guangzhou University of Chinese Medicine, Guangzhou 510006, China.

3The Second Clinical College, Guangzhou University of Chinese Medicine, Guangzhou 510006, China.

4College of Chemistry and Molecular Engineering, Peking University, Beijing 100871, China.

5State Key Laboratory of New-Tech for Chinese Medicine Pharmaceutical Process, Lianyungang 222001, China.

Correspondence should be addressed to Wei Xiao (xw_kanion@163.com) and Jiangyong Gu (gujy@gzucm.edu.cn).


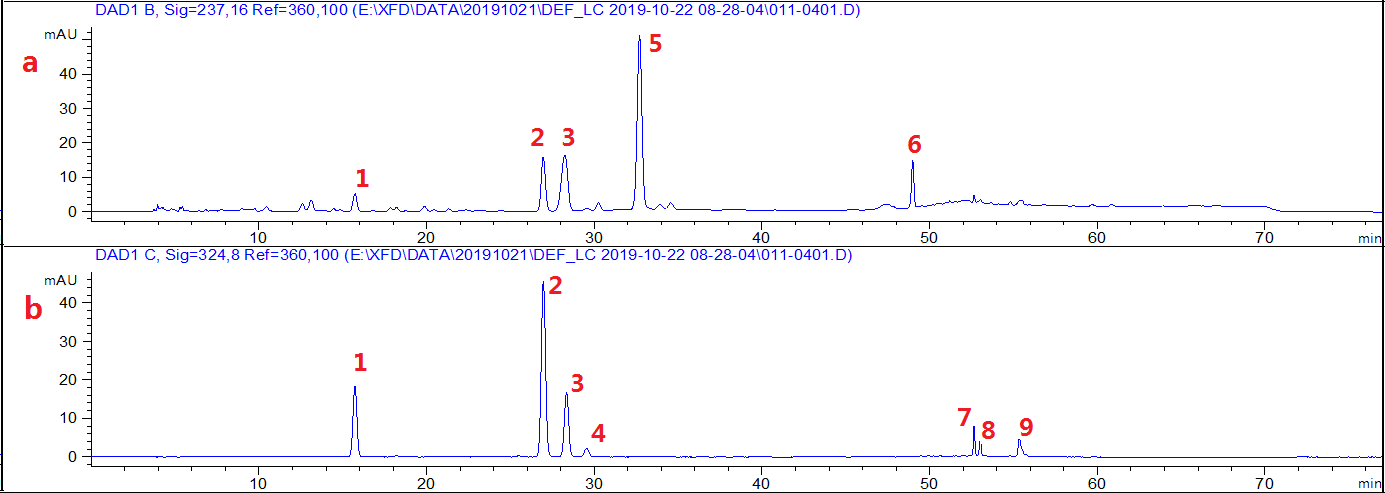


**Supplementary Figure S1:** HPLC spectra of RDNI at 237nm (a) and 324nm (b). The numbered peaks represent the nine compounds of RDNI: neochlorogenic acid (1), chlorogenic acid (2), cryptochlorogenic acid (3), caffeic acid (4), geniposide (5), secoxyloganin (6), isochlorogenic acid B (7), isochlorogenic acid A (8), isochlorogenic acid B (9).

| **Supplementary Table S1** Targets gathered in PubChem, Binding DB and TCMSP | | | |
| --- | --- | --- | --- |
| **Compound** | **Target** | **Abbreviation** | **Uniprot ID** |
| CAA | Aldose Reductase | AKR1B1 | P15121 |
| Arachidonate 5-lipoxygenase | ALOX5 | P09917 |
| Alkaline phosphatase, tissue-nonspecific isozyme | ALPL | P05186 |
| Carbonic Anhydrase 1 | CA1 | P00915 |
| Carbonic Anhydrase 12 | CA12 | O43570 |
| Carbonic Anhydrase 14 | CA14 | Q9ULX7 |
| Carbonic Anhydrase 2 | CA2 | P00918 |
| Carbonic Anhydrase 3 | CA3 | P07451 |
| Carbonic Anhydrase 4 | CA4 | P22748 |
| Carbonic Anhydrase 5A, Mitochondrial | CA5A | P35218 |
| Carbonic Anhydrase 5B, Mitochondrial | CA5B | Q9Y2D0 |
| Carbonic Anhydrase 6 | CA6 | P23280 |
| Carbonic Anhydrase 7 | CA7 | P43166 |
| Carbonic Anhydrase 9 | CA9 | Q16790 |
| Carbonic Anhydrase 13 | CA13 | Q8N1Q1 |
| Estrogen Receptor Beta | ESR2 | Q92731 |
| Lysosomal alpha-glucosidase | GAA | P10253 |
| Glyceraldehyde-3-phosphate dehydrogenase | GAPDH | P04406 |
| FAD-linked sulfhydryl oxidase ALR | GFER | P55789 |
| Glutaminase Kidney Isoform, Mitochondrial | GLS | O94925 |
| Heat shock protein HSP 90-alpha | HSP90AA1 | P07900 |
| Heat shock protein HSP 90-beta | HSP90AB1 | P08238 |
| Induced myeloid leukemia cell differentiation protein Mcl-1 | Mcl-1 | Q07820 |
| Interstitial Collagenase | MMP1 | P03956 |
| 72 kDa type IV collagenase | MMP2 | P08253 |
| Matrix metalloproteinase 9 | MMP9 | P14780 |
| Mannose-6-phosphate isomerase | MPI | P34949 |
| Prostaglandin G/H synthase 1 | PTGS1 | P23219 |
| Beta-1 adrenergic receptor | ADRB1 | P08588 |
| Prostaglandin G/H synthase 2 | PTGS2 | P35354 |
| Alpha-2A adrenergic receptor | ADRA2A | P08913 |
| Alpha-2C adrenergic receptor | ADRA2C | P18825 |
| Beta-2 adrenergic receptor | ADRB2 | P07550 |
| Amine oxidase [flavin-containing] B | MAOB | P27338 |
| Amine oxidase [flavin-containing] A | MAOA | P21397 |
| Epidermal growth factor receptor | EGFR | P00533 |
| Chymotrypsinogen B | CTRB1 | P17538 |
| FA | Arachidonate 5-lipoxygenase | ALOX15 | P09917 |
| Amyloid-beta A4 protein | APP | P05067 |
| Carbonic Anhydrase 1 | CA1 | P00915 |
| Carbonic Anhydrase 12 | CA12 | O43570 |
| Carbonic Anhydrase 14 | CA14 | Q9ULX7 |
| Carbonic Anhydrase 2 | CA2 | P00918 |
| Carbonic Anhydrase 3 | CA3 | P07451 |
| Carbonic Anhydrase 4 | CA4 | P22748 |
| Carbonic Anhydrase 5A, Mitochondrial | CA5A | P35218 |
| Carbonic Anhydrase 5B, Mitochondrial | CA5B | Q9Y2D0 |
| Carbonic Anhydrase 6 | CA6 | P23280 |
| Carbonic Anhydrase 7 | CA7 | P43166 |
| Carbonic Anhydrase 9 | CA9 | Q16790 |
| Carbonic Anhydrase 13 | Car13 | Q8N1Q1 |
| Frataxin, Mitochondrial | FXN | Q16595 |
| FAD-linked sulfhydryl oxidase ALR | GFER | P55789 |
| Prostaglandin G/H synthase 1 | PTGS1 | P23219 |
| Prostaglandin G/H synthase 2 | PTGS2 | P35354 |
| Nitric-oxide synthase, endothelial | eNOS | P29474 |
| Alpha-2A adrenergic receptor | ADRA2A | P08913 |
| Sodium-dependent noradrenaline transporter | SLC6A2 | P23975 |
| Alpha-1A adrenergic receptor | ADRA1A | P35348 |
| Sodium-dependent dopamine transporter | SLC6A3 | Q01959 |
| Beta-2 adrenergic receptor | ADRB2 | P07550 |
| Leukotriene A-4 hydrolase | LTA4H | P09960 |
| Amine oxidase [flavin-containing] B | MAOB | P27338 |
| Amine oxidase [flavin-containing] A | MAOA | P21397 |
| Chymotrypsinogen B | CTRB1 | P17538 |
| mRNA of PKA Catalytic Subunit C-alpha | PRKACA | P17612 |
| Alpha-2B adrenergic receptor | ADRA2B | P18089 |
| Urokinase-type plasminogen activator | PLAU | P00749 |
| Heat shock protein HSP 90 | HSP90AB1 | P08238 |
| β-Carbonic anhydrase 3 | CA3 | P07451 |
| Gen | Carbonic anhydrase II | CA2 | P00918 |
| Apoptosis regulator Bcl-2 | Bcl-2 | P10415 |
| Heme oxygenase 1 | HMOX1 | P09601 |
| Neuromodulin | GAP43 | P17677 |
| Phospholipase B1, membrane-associated | PLB1 | Q6P1J6 |
| Glucagon | GCG | P01275 |
| Glutathione S-transferase Mu 1 | GSTM1 | P09488 |
| Glutathione S-transferase Mu 2 | GSTM2 | P28161 |
| Gep | Prostaglandin G/H synthase 1 | PTGS1 | P23219 |
| Prostaglandin G/H synthase 2 | PTGS2 | P35354 |
| Carbonic anhydrase II | CA2 | P00918 |
| Gamma-aminobutyric-acid receptor alpha-2 subunit | GABRA2 | P47869 |
| Gamma-aminobutyric acid receptor subunit alpha-1 | GABRA1 | P14867 |
| Thymidine kinase | TK1 | P04183 |
| Trypsin-1 | PRSS1 | P07477 |
| Glutamate receptor 2 | GRIA2 | P42262 |
| Gamma-aminobutyric-acid receptor subunit alpha-6 | GABRA6 | Q16445 |
| Canalicular multispecific organic anion transporter 1 | ABCC2 | Q92887 |
| Early Growth Response Protein 1 | EGR1 | P18146 |
| IsoA | Aldose Reductase | AKR1B1 | P15121 |
| Aldo-keto reductase family 1 member B10 | AKR1B10 | O60218 |
| Amyloid-beta A4 protein | APP | P05067 |
| mRNA of Protein-tyrosine phosphatase, non-receptor type 1 | PTPN1 | P18031 |
| Coagulation factor Xa | F10 | P00742 |
| IsoB | Aldose Reductase | AKR1B1 | P15121 |
| Aldo-keto reductase family 1 member B10 | AKR1B10 | O60218 |
| Amyloid-beta A4 protein | APP | P05067 |
| mRNA of Protein-tyrosine phosphatase, non-receptor type 1 | PTPN1 | P18031 |
| Coagulation factor Xa | F10 | P00742 |
| IsoC | Amyloid-beta A4 protein | APP | P05067 |
| CGA | mRNA of Protein-tyrosine phosphatase, non-receptor type 1 | PTPN1 | P18031 |
| FAD-linked sulfhydryl oxidase ALR | GFER | P55789 |
| Integrin alpha-4 | ITGA4 | P13612 |
| Prostaglandin G/H synthase 2 | PTGS2 | P35354 |
| 5CQA | Lysosomal alpha-glucosidase | GAA | P10253 |
| 4CQA | Prostaglandin G/H synthase 2 | PTGS2 | P35354 |
| Sec | Carbonic anhydrase II | CA2 | P00918 |
| Dipeptidyl peptidase IV | DPP4 | P27487 |

**Supplementary Table S2** Network topological parameters of CTN

| **Target Uniprot ID** | **Degree centrality** | **Betweenness centrality** | **Closeness centrality** |
| --- | --- | --- | --- |
| P51580 | 6 | 0.07622685 | 0.32081911 |
| P00918 | 5 | 0.19148582 | 0.41409692 |
| P35354 | 5 | 0.1340029 | 0.41048035 |
| O43741 | 4 | 0.01360021 | 0.29283489 |
| P05067 | 4 | 0.08463165 | 0.35741445 |
| P06401 | 4 | 0.01554422 | 0.29283489 |
| P14555 | 4 | 0.01818677 | 0.29652997 |
| P15121 | 4 | 0.08478283 | 0.37450199 |
| P23219 | 3 | 0.04294203 | 0.37751004 |
| P35367 | 3 | 0.00427314 | 0.28571429 |
| P37231 | 3 | 0.0025207 | 0.26934097 |
| P55789 | 3 | 0.0185906 | 0.36293436 |
| O43570 | 2 | 0.0021602 | 0.34944238 |
| O60218 | 2 | 4.23E-04 | 0.26478873 |
| P00742 | 2 | 4.23E-04 | 0.26478873 |
| P00915 | 2 | 0.0021602 | 0.34944238 |
| P04150 | 2 | 4.23E-04 | 0.26478873 |
| P07451 | 2 | 0.0021602 | 0.34944238 |
| P07550 | 2 | 0.0021602 | 0.34944238 |
| P08238 | 2 | 0.0021602 | 0.34944238 |
| P08913 | 2 | 0.0021602 | 0.34944238 |
| P09917 | 2 | 0.0021602 | 0.34944238 |
| P10253 | 2 | 0.038722 | 0.33691756 |
| P17538 | 2 | 0.0021602 | 0.34944238 |
| P18031 | 2 | 4.23E-04 | 0.26478873 |
| P21397 | 2 | 0.0021602 | 0.34944238 |
| P22748 | 2 | 0.0021602 | 0.34944238 |
| P23280 | 2 | 0.0021602 | 0.34944238 |
| P27338 | 2 | 0.0021602 | 0.34944238 |
| P29474 | 2 | 0.02000543 | 0.33935018 |
| P35218 | 2 | 0.0021602 | 0.34944238 |
| P43166 | 2 | 0.0021602 | 0.34944238 |
| Q16790 | 2 | 0.0021602 | 0.34944238 |
| Q8N1Q1 | 2 | 0.0021602 | 0.34944238 |
| Q9ULX7 | 2 | 0.0021602 | 0.34944238 |
| Q9Y2D0 | 2 | 0.0021602 | 0.34944238 |
| O94925 | 1 | 0 | 0.31649832 |
| P00533 | 1 | 0 | 0.31649832 |
| P00749 | 1 | 0 | 0.30618893 |
| P01275 | 1 | 0 | 0.26628895 |
| P02747 | 1 | 0 | 0.26330532 |
| P03956 | 1 | 0 | 0.31649832 |
| P04183 | 1 | 0 | 0.25201072 |
| P04406 | 1 | 0 | 0.31649832 |
| P05164 | 1 | 0 | 0.23558897 |
| P05186 | 1 | 0 | 0.31649832 |
| P07477 | 1 | 0 | 0.25201072 |
| P07900 | 1 | 0 | 0.31649832 |
| P08253 | 1 | 0 | 0.31649832 |
| P08588 | 1 | 0 | 0.31649832 |
| P09210 | 1 | 0 | 0.22871046 |
| P09488 | 1 | 0 | 0.26628895 |
| P09601 | 1 | 0 | 0.26628895 |
| P09960 | 1 | 0 | 0.30618893 |
| P10275 | 1 | 0 | 0.26478873 |
| P10276 | 1 | 0 | 0.22871046 |
| P10415 | 1 | 0 | 0.26628895 |
| P10826 | 1 | 0 | 0.23558897 |
| P12104 | 1 | 0 | 0.25895317 |
| P13612 | 1 | 0 | 0.26478873 |
| P14780 | 1 | 0 | 0.31649832 |
| P14867 | 1 | 0 | 0.25201072 |
| P17612 | 1 | 0 | 0.30618893 |
| P17677 | 1 | 0 | 0.26628895 |
| P18089 | 1 | 0 | 0.30618893 |
| P18146 | 1 | 0 | 0.25201072 |
| P18825 | 1 | 0 | 0.31649832 |
| P23975 | 1 | 0 | 0.30618893 |
| P27487 | 1 | 0 | 0.22871046 |
| P28161 | 1 | 0 | 0.26628895 |
| P28845 | 1 | 0 | 0.25201072 |
| P34949 | 1 | 0 | 0.31649832 |
| P35348 | 1 | 0 | 0.30618893 |
| P42262 | 1 | 0 | 0.25201072 |
| P47869 | 1 | 0 | 0.25201072 |
| Q01959 | 1 | 0 | 0.30618893 |
| Q07820 | 1 | 0 | 0.31649832 |
| Q07869 | 1 | 0 | 0.25613079 |
| Q16445 | 1 | 0 | 0.25201072 |
| Q16595 | 1 | 0 | 0.30618893 |
| Q6P1J6 | 1 | 0 | 0.26628895 |
| Q8N8N7 | 1 | 0 | 0.25613079 |
| Q92731 | 1 | 0 | 0.31649832 |
| Q92887 | 1 | 0 | 0.25201072 |
| Q2VPJ6 | 1 | 0 | 0.31803279 |
| Q6P7A9 | 1 | 0 | 0.31803279 |

| **Supplementary Table S3** Target-pathway relationships of potential targets of RDNI | | | |
| --- | --- | --- | --- |
| **Target** | **Gene ID** | **Pathway** | **Pathway Name** |
| O43570 | 771 | hsa00910 | Nitrogen metabolism |
| O60218 | 57016 | hsa00040 | Pentose and glucuronate interconversions |
| O60218 | 57016 | hsa00051 | Fructose and mannose metabolism |
| O60218 | 57016 | hsa00052 | Galactose metabolism |
| O60218 | 57016 | hsa00561 | Glycerolipid metabolism |
| O60218 | 57016 | hsa00790 | Folate biosynthesis |
| O60218 | 57016 | hsa01100 | Metabolic pathways |
| O94925 | 2744 | hsa00220 | Arginine biosynthesis |
| O94925 | 2744 | hsa00250 | Alanine, aspartate and glutamate metabolism |
| O94925 | 2744 | hsa00471 | D-Glutamine and D-glutamate metabolism |
| O94925 | 2744 | hsa01100 | Metabolic pathways |
| O94925 | 2744 | hsa04724 | Glutamatergic synapse |
| O94925 | 2744 | hsa04727 | GABAergic synapse |
| O94925 | 2744 | hsa04964 | Proximal tubule bicarbonate reclamation |
| O94925 | 2744 | hsa05206 | MicroRNAs in cancer |
| O94925 | 2744 | hsa05230 | Central carbon metabolism in cancer |
| P00533 | 1956 | hsa01521 | EGFR tyrosine kinase inhibitor resistance |
| P00533 | 1956 | hsa01522 | Endocrine resistance |
| P00533 | 1956 | hsa04010 | MAPK signaling pathway |
| P00533 | 1956 | hsa04012 | ErbB signaling pathway |
| P00533 | 1956 | hsa04014 | Ras signaling pathway |
| P00533 | 1956 | hsa04015 | Rap1 signaling pathway |
| P00533 | 1956 | hsa04020 | Calcium signaling pathway |
| P00533 | 1956 | hsa04066 | HIF-1 signaling pathway |
| P00533 | 1956 | hsa04068 | FoxO signaling pathway |
| P00533 | 1956 | hsa04072 | Phospholipase D signaling pathway |
| P00533 | 1956 | hsa04144 | Endocytosis |
| P00533 | 1956 | hsa04151 | PI3K-Akt signaling pathway |
| P00533 | 1956 | hsa04510 | Focal adhesion |
| P00533 | 1956 | hsa04520 | Adherens junction |
| P00533 | 1956 | hsa04540 | Gap junction |
| P00533 | 1956 | hsa04630 | Jak-STAT signaling pathway |
| P00533 | 1956 | hsa04810 | Regulation of actin cytoskeleton |
| P00533 | 1956 | hsa04912 | GnRH signaling pathway |
| P00533 | 1956 | hsa04915 | Estrogen signaling pathway |
| P00533 | 1956 | hsa04921 | Oxytocin signaling pathway |
| P00533 | 1956 | hsa04926 | Relaxin signaling pathway |
| P00533 | 1956 | hsa04928 | Parathyroid hormone synthesis, secretion and action |
| P00533 | 1956 | hsa04934 | Cushing syndrome |
| P00533 | 1956 | hsa05120 | Epithelial cell signaling in Helicobacter pylori infection |
| P00533 | 1956 | hsa05160 | Hepatitis C |
| P00533 | 1956 | hsa05163 | Human cytomegalovirus infection |
| P00533 | 1956 | hsa05165 | Human papillomavirus infection |
| P00533 | 1956 | hsa05200 | Pathways in cancer |
| P00533 | 1956 | hsa05205 | Proteoglycans in cancer |
| P00533 | 1956 | hsa05206 | MicroRNAs in cancer |
| P00533 | 1956 | hsa05210 | Colorectal cancer |
| P00533 | 1956 | hsa05212 | Pancreatic cancer |
| P00533 | 1956 | hsa05213 | Endometrial cancer |
| P00533 | 1956 | hsa05214 | Glioma |
| P00533 | 1956 | hsa05215 | Prostate cancer |
| P00533 | 1956 | hsa05218 | Melanoma |
| P00533 | 1956 | hsa05219 | Bladder cancer |
| P00533 | 1956 | hsa05223 | Non-small cell lung cancer |
| P00533 | 1956 | hsa05224 | Breast cancer |
| P00533 | 1956 | hsa05225 | Hepatocellular carcinoma |
| P00533 | 1956 | hsa05226 | Gastric cancer |
| P00533 | 1956 | hsa05230 | Central carbon metabolism in cancer |
| P00533 | 1956 | hsa05231 | Choline metabolism in cancer |
| P00742 | 2159 | hsa04610 | Complement and coagulation cascades |
| P00749 | 5328 | hsa04064 | NF-kappa B signaling pathway |
| P00749 | 5328 | hsa04610 | Complement and coagulation cascades |
| P00749 | 5328 | hsa05202 | Transcriptional misregulation in cancer |
| P00749 | 5328 | hsa05205 | Proteoglycans in cancer |
| P00749 | 5328 | hsa05206 | MicroRNAs in cancer |
| P00749 | 5328 | hsa05215 | Prostate cancer |
| P00915 | 759 | hsa00910 | Nitrogen metabolism |
| P00918 | 760 | hsa00910 | Nitrogen metabolism |
| P00918 | 760 | hsa04964 | Proximal tubule bicarbonate reclamation |
| P00918 | 760 | hsa04966 | Collecting duct acid secretion |
| P00918 | 760 | hsa04971 | Gastric acid secretion |
| P00918 | 760 | hsa04972 | Pancreatic secretion |
| P00918 | 760 | hsa04976 | Bile secretion |
| P01275 | 2641 | hsa04714 | Thermogenesis |
| P01275 | 2641 | hsa04911 | Insulin secretion |
| P01275 | 2641 | hsa04922 | Glucagon signaling pathway |
| P03956 | 4312 | hsa03320 | PPAR signaling pathway |
| P03956 | 4312 | hsa04657 | IL-17 signaling pathway |
| P03956 | 4312 | hsa04926 | Relaxin signaling pathway |
| P03956 | 4312 | hsa05200 | Pathways in cancer |
| P03956 | 4312 | hsa05219 | Bladder cancer |
| P03956 | 4312 | hsa05323 | Rheumatoid arthritis |
| P04183 | 7083 | hsa00240 | Pyrimidine metabolism |
| P04183 | 7083 | hsa00983 | Drug metabolism - other enzymes |
| P04183 | 7083 | hsa01100 | Metabolic pathways |
| P04406 | 2597 | hsa00010 | Glycolysis / Gluconeogenesis |
| P04406 | 2597 | hsa01100 | Metabolic pathways |
| P04406 | 2597 | hsa01200 | Carbon metabolism |
| P04406 | 2597 | hsa01230 | Biosynthesis of amino acids |
| P04406 | 2597 | hsa04066 | HIF-1 signaling pathway |
| P04406 | 2597 | hsa05010 | Alzheimer disease |
| P05067 | 351 | hsa04726 | Serotonergic synapse |
| P05067 | 351 | hsa05010 | Alzheimer disease |
| P05186 | 249 | hsa00730 | Thiamine metabolism |
| P05186 | 249 | hsa00790 | Folate biosynthesis |
| P05186 | 249 | hsa01100 | Metabolic pathways |
| P07451 | 761 | hsa00910 | Nitrogen metabolism |
| P07477 | 5644 | hsa04080 | Neuroactive ligand-receptor interaction |
| P07477 | 5644 | hsa04972 | Pancreatic secretion |
| P07477 | 5644 | hsa04974 | Protein digestion and absorption |
| P07477 | 5644 | hsa05164 | Influenza A |
| P07550 | 154 | hsa04020 | Calcium signaling pathway |
| P07550 | 154 | hsa04022 | cGMP-PKG signaling pathway |
| P07550 | 154 | hsa04024 | cAMP signaling pathway |
| P07550 | 154 | hsa04080 | Neuroactive ligand-receptor interaction |
| P07550 | 154 | hsa04261 | Adrenergic signaling in cardiomyocytes |
| P07550 | 154 | hsa04923 | Regulation of lipolysis in adipocytes |
| P07550 | 154 | hsa04924 | Renin secretion |
| P07550 | 154 | hsa04970 | Salivary secretion |
| P07900 | 3320 | hsa04141 | Protein processing in endoplasmic reticulum |
| P07900 | 3320 | hsa04151 | PI3K-Akt signaling pathway |
| P07900 | 3320 | hsa04217 | Necroptosis |
| P07900 | 3320 | hsa04612 | Antigen processing and presentation |
| P07900 | 3320 | hsa04621 | NOD-like receptor signaling pathway |
| P07900 | 3320 | hsa04657 | IL-17 signaling pathway |
| P07900 | 3320 | hsa04659 | Th17 cell differentiation |
| P07900 | 3320 | hsa04914 | Progesterone-mediated oocyte maturation |
| P07900 | 3320 | hsa04915 | Estrogen signaling pathway |
| P07900 | 3320 | hsa05200 | Pathways in cancer |
| P07900 | 3320 | hsa05215 | Prostate cancer |
| P07900 | 3320 | hsa05418 | Fluid shear stress and atherosclerosis |
| P08238 | 3326 | hsa04141 | Protein processing in endoplasmic reticulum |
| P08238 | 3326 | hsa04151 | PI3K-Akt signaling pathway |
| P08238 | 3326 | hsa04217 | Necroptosis |
| P08238 | 3326 | hsa04612 | Antigen processing and presentation |
| P08238 | 3326 | hsa04621 | NOD-like receptor signaling pathway |
| P08238 | 3326 | hsa04657 | IL-17 signaling pathway |
| P08238 | 3326 | hsa04659 | Th17 cell differentiation |
| P08238 | 3326 | hsa04914 | Progesterone-mediated oocyte maturation |
| P08238 | 3326 | hsa04915 | Estrogen signaling pathway |
| P08238 | 3326 | hsa05200 | Pathways in cancer |
| P08238 | 3326 | hsa05215 | Prostate cancer |
| P08238 | 3326 | hsa05418 | Fluid shear stress and atherosclerosis |
| P08253 | 4313 | hsa01522 | Endocrine resistance |
| P08253 | 4313 | hsa04670 | Leukocyte transendothelial migration |
| P08253 | 4313 | hsa04912 | GnRH signaling pathway |
| P08253 | 4313 | hsa04915 | Estrogen signaling pathway |
| P08253 | 4313 | hsa04926 | Relaxin signaling pathway |
| P08253 | 4313 | hsa04933 | AGE-RAGE signaling pathway in diabetic complications |
| P08253 | 4313 | hsa05200 | Pathways in cancer |
| P08253 | 4313 | hsa05205 | Proteoglycans in cancer |
| P08253 | 4313 | hsa05219 | Bladder cancer |
| P08253 | 4313 | hsa05418 | Fluid shear stress and atherosclerosis |
| P08588 | 153 | hsa04020 | Calcium signaling pathway |
| P08588 | 153 | hsa04022 | cGMP-PKG signaling pathway |
| P08588 | 153 | hsa04024 | cAMP signaling pathway |
| P08588 | 153 | hsa04080 | Neuroactive ligand-receptor interaction |
| P08588 | 153 | hsa04261 | Adrenergic signaling in cardiomyocytes |
| P08588 | 153 | hsa04540 | Gap junction |
| P08588 | 153 | hsa04923 | Regulation of lipolysis in adipocytes |
| P08588 | 153 | hsa04924 | Renin secretion |
| P08588 | 153 | hsa04970 | Salivary secretion |
| P08588 | 153 | hsa05414 | Dilated cardiomyopathy (DCM) |
| P08913 | 150 | hsa04022 | cGMP-PKG signaling pathway |
| P08913 | 150 | hsa04080 | Neuroactive ligand-receptor interaction |
| P09488 | 2944 | hsa00480 | Glutathione metabolism |
| P09488 | 2944 | hsa00980 | Metabolism of xenobiotics by cytochrome P450 |
| P09488 | 2944 | hsa00982 | Drug metabolism - cytochrome P450 |
| P09488 | 2944 | hsa00983 | Drug metabolism - other enzymes |
| P09488 | 2944 | hsa01524 | Platinum drug resistance |
| P09488 | 2944 | hsa05200 | Pathways in cancer |
| P09488 | 2944 | hsa05204 | Chemical carcinogenesis |
| P09488 | 2944 | hsa05225 | Hepatocellular carcinoma |
| P09488 | 2944 | hsa05418 | Fluid shear stress and atherosclerosis |
| P09601 | 3162 | hsa00860 | Porphyrin and chlorophyll metabolism |
| P09601 | 3162 | hsa01100 | Metabolic pathways |
| P09601 | 3162 | hsa04066 | HIF-1 signaling pathway |
| P09601 | 3162 | hsa04216 | Ferroptosis |
| P09601 | 3162 | hsa04978 | Mineral absorption |
| P09601 | 3162 | hsa05200 | Pathways in cancer |
| P09601 | 3162 | hsa05206 | MicroRNAs in cancer |
| P09601 | 3162 | hsa05225 | Hepatocellular carcinoma |
| P09601 | 3162 | hsa05418 | Fluid shear stress and atherosclerosis |
| P09917 | 240 | hsa00590 | Arachidonic acid metabolism |
| P09917 | 240 | hsa01100 | Metabolic pathways |
| P09917 | 240 | hsa04664 | Fc epsilon RI signaling pathway |
| P09917 | 240 | hsa04726 | Serotonergic synapse |
| P09917 | 240 | hsa04913 | Ovarian steroidogenesis |
| P09917 | 240 | hsa05145 | Toxoplasmosis |
| P09960 | 4048 | hsa00590 | Arachidonic acid metabolism |
| P09960 | 4048 | hsa01100 | Metabolic pathways |
| P10253 | 2548 | hsa00052 | Galactose metabolism |
| P10253 | 2548 | hsa00500 | Starch and sucrose metabolism |
| P10253 | 2548 | hsa01100 | Metabolic pathways |
| P10253 | 2548 | hsa04142 | Lysosome |
| P10415 | 596 | hsa01521 | EGFR tyrosine kinase inhibitor resistance |
| P10415 | 596 | hsa01522 | Endocrine resistance |
| P10415 | 596 | hsa01524 | Platinum drug resistance |
| P10415 | 596 | hsa04064 | NF-kappa B signaling pathway |
| P10415 | 596 | hsa04066 | HIF-1 signaling pathway |
| P10415 | 596 | hsa04071 | Sphingolipid signaling pathway |
| P10415 | 596 | hsa04115 | p53 signaling pathway |
| P10415 | 596 | hsa04140 | Autophagy - animal |
| P10415 | 596 | hsa04141 | Protein processing in endoplasmic reticulum |
| P10415 | 596 | hsa04151 | PI3K-Akt signaling pathway |
| P10415 | 596 | hsa04210 | Apoptosis |
| P10415 | 596 | hsa04215 | Apoptosis - multiple species |
| P10415 | 596 | hsa04217 | Necroptosis |
| P10415 | 596 | hsa04261 | Adrenergic signaling in cardiomyocytes |
| P10415 | 596 | hsa04340 | Hedgehog signaling pathway |
| P10415 | 596 | hsa04510 | Focal adhesion |
| P10415 | 596 | hsa04621 | NOD-like receptor signaling pathway |
| P10415 | 596 | hsa04630 | Jak-STAT signaling pathway |
| P10415 | 596 | hsa04722 | Neurotrophin signaling pathway |
| P10415 | 596 | hsa04725 | Cholinergic synapse |
| P10415 | 596 | hsa04915 | Estrogen signaling pathway |
| P10415 | 596 | hsa04928 | Parathyroid hormone synthesis, secretion and action |
| P10415 | 596 | hsa04933 | AGE-RAGE signaling pathway in diabetic complications |
| P10415 | 596 | hsa05014 | Amyotrophic lateral sclerosis (ALS) |
| P10415 | 596 | hsa05145 | Toxoplasmosis |
| P10415 | 596 | hsa05152 | Tuberculosis |
| P10415 | 596 | hsa05161 | Hepatitis B |
| P10415 | 596 | hsa05169 | Epstein-Barr virus infection |
| P10415 | 596 | hsa05200 | Pathways in cancer |
| P10415 | 596 | hsa05206 | MicroRNAs in cancer |
| P10415 | 596 | hsa05210 | Colorectal cancer |
| P10415 | 596 | hsa05215 | Prostate cancer |
| P10415 | 596 | hsa05222 | Small cell lung cancer |
| P10415 | 596 | hsa05226 | Gastric cancer |
| P10415 | 596 | hsa05418 | Fluid shear stress and atherosclerosis |
| P13612 | 3676 | hsa04151 | PI3K-Akt signaling pathway |
| P13612 | 3676 | hsa04510 | Focal adhesion |
| P13612 | 3676 | hsa04512 | ECM-receptor interaction |
| P13612 | 3676 | hsa04514 | Cell adhesion molecules (CAMs) |
| P13612 | 3676 | hsa04640 | Hematopoietic cell lineage |
| P13612 | 3676 | hsa04670 | Leukocyte transendothelial migration |
| P13612 | 3676 | hsa04672 | Intestinal immune network for IgA production |
| P13612 | 3676 | hsa04810 | Regulation of actin cytoskeleton |
| P13612 | 3676 | hsa05140 | Leishmaniasis |
| P13612 | 3676 | hsa05165 | Human papillomavirus infection |
| P13612 | 3676 | hsa05410 | Hypertrophic cardiomyopathy (HCM) |
| P13612 | 3676 | hsa05412 | Arrhythmogenic right ventricular cardiomyopathy (ARVC) |
| P13612 | 3676 | hsa05414 | Dilated cardiomyopathy (DCM) |
| P14780 | 4318 | hsa01522 | Endocrine resistance |
| P14780 | 4318 | hsa04657 | IL-17 signaling pathway |
| P14780 | 4318 | hsa04668 | TNF signaling pathway |
| P14780 | 4318 | hsa04670 | Leukocyte transendothelial migration |
| P14780 | 4318 | hsa04915 | Estrogen signaling pathway |
| P14780 | 4318 | hsa04926 | Relaxin signaling pathway |
| P14780 | 4318 | hsa05161 | Hepatitis B |
| P14780 | 4318 | hsa05200 | Pathways in cancer |
| P14780 | 4318 | hsa05202 | Transcriptional misregulation in cancer |
| P14780 | 4318 | hsa05205 | Proteoglycans in cancer |
| P14780 | 4318 | hsa05206 | MicroRNAs in cancer |
| P14780 | 4318 | hsa05215 | Prostate cancer |
| P14780 | 4318 | hsa05219 | Bladder cancer |
| P14780 | 4318 | hsa05418 | Fluid shear stress and atherosclerosis |
| P14867 | 2554 | hsa04080 | Neuroactive ligand-receptor interaction |
| P14867 | 2554 | hsa04723 | Retrograde endocannabinoid signaling |
| P14867 | 2554 | hsa04727 | GABAergic synapse |
| P14867 | 2554 | hsa04742 | Taste transduction |
| P14867 | 2554 | hsa05032 | Morphine addiction |
| P14867 | 2554 | hsa05033 | Nicotine addiction |
| P15121 | 231 | hsa00040 | Pentose and glucuronate interconversions |
| P15121 | 231 | hsa00051 | Fructose and mannose metabolism |
| P15121 | 231 | hsa00052 | Galactose metabolism |
| P15121 | 231 | hsa00561 | Glycerolipid metabolism |
| P15121 | 231 | hsa00790 | Folate biosynthesis |
| P15121 | 231 | hsa01100 | Metabolic pathways |
| P17538 | 1504 | hsa04972 | Pancreatic secretion |
| P17538 | 1504 | hsa04974 | Protein digestion and absorption |
| P17612 | 5566 | hsa01522 | Endocrine resistance |
| P17612 | 5566 | hsa04010 | MAPK signaling pathway |
| P17612 | 5566 | hsa04014 | Ras signaling pathway |
| P17612 | 5566 | hsa04020 | Calcium signaling pathway |
| P17612 | 5566 | hsa04024 | cAMP signaling pathway |
| P17612 | 5566 | hsa04062 | Chemokine signaling pathway |
| P17612 | 5566 | hsa04114 | Oocyte meiosis |
| P17612 | 5566 | hsa04140 | Autophagy - animal |
| P17612 | 5566 | hsa04211 | Longevity regulating pathway |
| P17612 | 5566 | hsa04213 | Longevity regulating pathway - multiple species |
| P17612 | 5566 | hsa04261 | Adrenergic signaling in cardiomyocytes |
| P17612 | 5566 | hsa04270 | Vascular smooth muscle contraction |
| P17612 | 5566 | hsa04310 | Wnt signaling pathway |
| P17612 | 5566 | hsa04340 | Hedgehog signaling pathway |
| P17612 | 5566 | hsa04371 | Apelin signaling pathway |
| P17612 | 5566 | hsa04530 | Tight junction |
| P17612 | 5566 | hsa04540 | Gap junction |
| P17612 | 5566 | hsa04611 | Platelet activation |
| P17612 | 5566 | hsa04713 | Circadian entrainment |
| P17612 | 5566 | hsa04714 | Thermogenesis |
| P17612 | 5566 | hsa04720 | Long-term potentiation |
| P17612 | 5566 | hsa04723 | Retrograde endocannabinoid signaling |
| P17612 | 5566 | hsa04724 | Glutamatergic synapse |
| P17612 | 5566 | hsa04725 | Cholinergic synapse |
| P17612 | 5566 | hsa04726 | Serotonergic synapse |
| P17612 | 5566 | hsa04727 | GABAergic synapse |
| P17612 | 5566 | hsa04728 | Dopaminergic synapse |
| P17612 | 5566 | hsa04740 | Olfactory transduction |
| P17612 | 5566 | hsa04742 | Taste transduction |
| P17612 | 5566 | hsa04750 | Inflammatory mediator regulation of TRP channels |
| P17612 | 5566 | hsa04910 | Insulin signaling pathway |
| P17612 | 5566 | hsa04911 | Insulin secretion |
| P17612 | 5566 | hsa04912 | GnRH signaling pathway |
| P17612 | 5566 | hsa04913 | Ovarian steroidogenesis |
| P17612 | 5566 | hsa04914 | Progesterone-mediated oocyte maturation |
| P17612 | 5566 | hsa04915 | Estrogen signaling pathway |
| P17612 | 5566 | hsa04916 | Melanogenesis |
| P17612 | 5566 | hsa04918 | Thyroid hormone synthesis |
| P17612 | 5566 | hsa04919 | Thyroid hormone signaling pathway |
| P17612 | 5566 | hsa04921 | Oxytocin signaling pathway |
| P17612 | 5566 | hsa04922 | Glucagon signaling pathway |
| P17612 | 5566 | hsa04923 | Regulation of lipolysis in adipocytes |
| P17612 | 5566 | hsa04924 | Renin secretion |
| P17612 | 5566 | hsa04925 | Aldosterone synthesis and secretion |
| P17612 | 5566 | hsa04926 | Relaxin signaling pathway |
| P17612 | 5566 | hsa04927 | Cortisol synthesis and secretion |
| P17612 | 5566 | hsa04928 | Parathyroid hormone synthesis, secretion and action |
| P17612 | 5566 | hsa04934 | Cushing syndrome |
| P17612 | 5566 | hsa04961 | Endocrine and other factor-regulated calcium reabsorption |
| P17612 | 5566 | hsa04962 | Vasopressin-regulated water reabsorption |
| P17612 | 5566 | hsa04970 | Salivary secretion |
| P17612 | 5566 | hsa04971 | Gastric acid secretion |
| P17612 | 5566 | hsa04976 | Bile secretion |
| P17612 | 5566 | hsa05012 | Parkinson disease |
| P17612 | 5566 | hsa05020 | Prion diseases |
| P17612 | 5566 | hsa05030 | Cocaine addiction |
| P17612 | 5566 | hsa05031 | Amphetamine addiction |
| P17612 | 5566 | hsa05032 | Morphine addiction |
| P17612 | 5566 | hsa05034 | Alcoholism |
| P17612 | 5566 | hsa05110 | Vibrio cholerae infection |
| P17612 | 5566 | hsa05146 | Amoebiasis |
| P17612 | 5566 | hsa05163 | Human cytomegalovirus infection |
| P17612 | 5566 | hsa05165 | Human papillomavirus infection |
| P17612 | 5566 | hsa05166 | HTLV-I infection |
| P17612 | 5566 | hsa05169 | Epstein-Barr virus infection |
| P17612 | 5566 | hsa05200 | Pathways in cancer |
| P17612 | 5566 | hsa05203 | Viral carcinogenesis |
| P17612 | 5566 | hsa05205 | Proteoglycans in cancer |
| P17612 | 5566 | hsa05414 | Dilated cardiomyopathy (DCM) |
| P18031 | 5770 | hsa04520 | Adherens junction |
| P18031 | 5770 | hsa04910 | Insulin signaling pathway |
| P18031 | 5770 | hsa04931 | Insulin resistance |
| P18089 | 151 | hsa04022 | cGMP-PKG signaling pathway |
| P18089 | 151 | hsa04080 | Neuroactive ligand-receptor interaction |
| P18146 | 1958 | hsa04371 | Apelin signaling pathway |
| P18146 | 1958 | hsa04912 | GnRH signaling pathway |
| P18146 | 1958 | hsa04928 | Parathyroid hormone synthesis, secretion and action |
| P18146 | 1958 | hsa04933 | AGE-RAGE signaling pathway in diabetic complications |
| P18146 | 1958 | hsa05020 | Prion diseases |
| P18146 | 1958 | hsa05166 | HTLV-I infection |
| P18825 | 152 | hsa04022 | cGMP-PKG signaling pathway |
| P18825 | 152 | hsa04080 | Neuroactive ligand-receptor interaction |
| P21397 | 4128 | hsa00260 | Glycine, serine and threonine metabolism |
| P21397 | 4128 | hsa00330 | Arginine and proline metabolism |
| P21397 | 4128 | hsa00340 | Histidine metabolism |
| P21397 | 4128 | hsa00350 | Tyrosine metabolism |
| P21397 | 4128 | hsa00360 | Phenylalanine metabolism |
| P21397 | 4128 | hsa00380 | Tryptophan metabolism |
| P21397 | 4128 | hsa00982 | Drug metabolism - cytochrome P450 |
| P21397 | 4128 | hsa01100 | Metabolic pathways |
| P21397 | 4128 | hsa04726 | Serotonergic synapse |
| P21397 | 4128 | hsa04728 | Dopaminergic synapse |
| P21397 | 4128 | hsa05030 | Cocaine addiction |
| P21397 | 4128 | hsa05031 | Amphetamine addiction |
| P21397 | 4128 | hsa05034 | Alcoholism |
| P22748 | 762 | hsa00910 | Nitrogen metabolism |
| P22748 | 762 | hsa04964 | Proximal tubule bicarbonate reclamation |
| P23219 | 5742 | hsa00590 | Arachidonic acid metabolism |
| P23219 | 5742 | hsa01100 | Metabolic pathways |
| P23219 | 5742 | hsa04611 | Platelet activation |
| P23219 | 5742 | hsa04726 | Serotonergic synapse |
| P23219 | 5742 | hsa04923 | Regulation of lipolysis in adipocytes |
| P23280 | 765 | hsa00910 | Nitrogen metabolism |
| P27338 | 4129 | hsa00260 | Glycine, serine and threonine metabolism |
| P27338 | 4129 | hsa00330 | Arginine and proline metabolism |
| P27338 | 4129 | hsa00340 | Histidine metabolism |
| P27338 | 4129 | hsa00350 | Tyrosine metabolism |
| P27338 | 4129 | hsa00360 | Phenylalanine metabolism |
| P27338 | 4129 | hsa00380 | Tryptophan metabolism |
| P27338 | 4129 | hsa00982 | Drug metabolism - cytochrome P450 |
| P27338 | 4129 | hsa01100 | Metabolic pathways |
| P27338 | 4129 | hsa04726 | Serotonergic synapse |
| P27338 | 4129 | hsa04728 | Dopaminergic synapse |
| P27338 | 4129 | hsa05030 | Cocaine addiction |
| P27338 | 4129 | hsa05031 | Amphetamine addiction |
| P27338 | 4129 | hsa05034 | Alcoholism |
| P27487 | 1803 | hsa04974 | Protein digestion and absorption |
| P28161 | 2946 | hsa00480 | Glutathione metabolism |
| P28161 | 2946 | hsa00980 | Metabolism of xenobiotics by cytochrome P450 |
| P28161 | 2946 | hsa00982 | Drug metabolism - cytochrome P450 |
| P28161 | 2946 | hsa00983 | Drug metabolism - other enzymes |
| P28161 | 2946 | hsa01524 | Platinum drug resistance |
| P28161 | 2946 | hsa05200 | Pathways in cancer |
| P28161 | 2946 | hsa05204 | Chemical carcinogenesis |
| P28161 | 2946 | hsa05225 | Hepatocellular carcinoma |
| P28161 | 2946 | hsa05418 | Fluid shear stress and atherosclerosis |
| P29474 | 4846 | hsa00220 | Arginine biosynthesis |
| P29474 | 4846 | hsa00330 | Arginine and proline metabolism |
| P29474 | 4846 | hsa01100 | Metabolic pathways |
| P29474 | 4846 | hsa04020 | Calcium signaling pathway |
| P29474 | 4846 | hsa04022 | cGMP-PKG signaling pathway |
| P29474 | 4846 | hsa04066 | HIF-1 signaling pathway |
| P29474 | 4846 | hsa04071 | Sphingolipid signaling pathway |
| P29474 | 4846 | hsa04151 | PI3K-Akt signaling pathway |
| P29474 | 4846 | hsa04370 | VEGF signaling pathway |
| P29474 | 4846 | hsa04371 | Apelin signaling pathway |
| P29474 | 4846 | hsa04611 | Platelet activation |
| P29474 | 4846 | hsa04915 | Estrogen signaling pathway |
| P29474 | 4846 | hsa04921 | Oxytocin signaling pathway |
| P29474 | 4846 | hsa04926 | Relaxin signaling pathway |
| P29474 | 4846 | hsa04931 | Insulin resistance |
| P29474 | 4846 | hsa04933 | AGE-RAGE signaling pathway in diabetic complications |
| P29474 | 4846 | hsa05418 | Fluid shear stress and atherosclerosis |
| P34949 | 4351 | hsa00051 | Fructose and mannose metabolism |
| P34949 | 4351 | hsa00520 | Amino sugar and nucleotide sugar metabolism |
| P34949 | 4351 | hsa01100 | Metabolic pathways |
| P35218 | 763 | hsa00910 | Nitrogen metabolism |
| P35348 | 148 | hsa04020 | Calcium signaling pathway |
| P35348 | 148 | hsa04022 | cGMP-PKG signaling pathway |
| P35348 | 148 | hsa04080 | Neuroactive ligand-receptor interaction |
| P35348 | 148 | hsa04152 | AMPK signaling pathway |
| P35348 | 148 | hsa04261 | Adrenergic signaling in cardiomyocytes |
| P35348 | 148 | hsa04270 | Vascular smooth muscle contraction |
| P35348 | 148 | hsa04970 | Salivary secretion |
| P35354 | 5743 | hsa00590 | Arachidonic acid metabolism |
| P35354 | 5743 | hsa01100 | Metabolic pathways |
| P35354 | 5743 | hsa04064 | NF-kappa B signaling pathway |
| P35354 | 5743 | hsa04370 | VEGF signaling pathway |
| P35354 | 5743 | hsa04625 | C-type lectin receptor signaling pathway |
| P35354 | 5743 | hsa04657 | IL-17 signaling pathway |
| P35354 | 5743 | hsa04668 | TNF signaling pathway |
| P35354 | 5743 | hsa04723 | Retrograde endocannabinoid signaling |
| P35354 | 5743 | hsa04726 | Serotonergic synapse |
| P35354 | 5743 | hsa04913 | Ovarian steroidogenesis |
| P35354 | 5743 | hsa04921 | Oxytocin signaling pathway |
| P35354 | 5743 | hsa04923 | Regulation of lipolysis in adipocytes |
| P35354 | 5743 | hsa05140 | Leishmaniasis |
| P35354 | 5743 | hsa05163 | Human cytomegalovirus infection |
| P35354 | 5743 | hsa05165 | Human papillomavirus infection |
| P35354 | 5743 | hsa05167 | Kaposi sarcoma-associated herpesvirus infection |
| P35354 | 5743 | hsa05200 | Pathways in cancer |
| P35354 | 5743 | hsa05204 | Chemical carcinogenesis |
| P35354 | 5743 | hsa05206 | MicroRNAs in cancer |
| P35354 | 5743 | hsa05222 | Small cell lung cancer |
| P42262 | 2891 | hsa04024 | cAMP signaling pathway |
| P42262 | 2891 | hsa04080 | Neuroactive ligand-receptor interaction |
| P42262 | 2891 | hsa04713 | Circadian entrainment |
| P42262 | 2891 | hsa04720 | Long-term potentiation |
| P42262 | 2891 | hsa04723 | Retrograde endocannabinoid signaling |
| P42262 | 2891 | hsa04724 | Glutamatergic synapse |
| P42262 | 2891 | hsa04728 | Dopaminergic synapse |
| P42262 | 2891 | hsa04730 | Long-term depression |
| P42262 | 2891 | hsa05014 | Amyotrophic lateral sclerosis (ALS) |
| P42262 | 2891 | hsa05030 | Cocaine addiction |
| P42262 | 2891 | hsa05031 | Amphetamine addiction |
| P42262 | 2891 | hsa05033 | Nicotine addiction |
| P43166 | 766 | hsa00910 | Nitrogen metabolism |
| P47869 | 2555 | hsa04080 | Neuroactive ligand-receptor interaction |
| P47869 | 2555 | hsa04723 | Retrograde endocannabinoid signaling |
| P47869 | 2555 | hsa04727 | GABAergic synapse |
| P47869 | 2555 | hsa04742 | Taste transduction |
| P47869 | 2555 | hsa05032 | Morphine addiction |
| P47869 | 2555 | hsa05033 | Nicotine addiction |
| Q01959 | 6531 | hsa04728 | Dopaminergic synapse |
| Q01959 | 6531 | hsa05012 | Parkinson disease |
| Q01959 | 6531 | hsa05030 | Cocaine addiction |
| Q01959 | 6531 | hsa05031 | Amphetamine addiction |
| Q01959 | 6531 | hsa05034 | Alcoholism |
| Q07820 | 4170 | hsa04151 | PI3K-Akt signaling pathway |
| Q07820 | 4170 | hsa04210 | Apoptosis |
| Q07820 | 4170 | hsa04630 | Jak-STAT signaling pathway |
| Q07820 | 4170 | hsa05206 | MicroRNAs in cancer |
| Q16445 | 2559 | hsa04080 | Neuroactive ligand-receptor interaction |
| Q16445 | 2559 | hsa04723 | Retrograde endocannabinoid signaling |
| Q16445 | 2559 | hsa04727 | GABAergic synapse |
| Q16445 | 2559 | hsa04742 | Taste transduction |
| Q16445 | 2559 | hsa05032 | Morphine addiction |
| Q16445 | 2559 | hsa05033 | Nicotine addiction |
| Q16595 | 2395 | hsa00860 | Porphyrin and chlorophyll metabolism |
| Q16790 | 768 | hsa00910 | Nitrogen metabolism |
| Q6P1J6 | 151056 | hsa00564 | Glycerophospholipid metabolism |
| Q6P1J6 | 151056 | hsa00565 | Ether lipid metabolism |
| Q6P1J6 | 151056 | hsa00590 | Arachidonic acid metabolism |
| Q6P1J6 | 151056 | hsa00591 | Linoleic acid metabolism |
| Q6P1J6 | 151056 | hsa00592 | alpha-Linolenic acid metabolism |
| Q6P1J6 | 151056 | hsa01100 | Metabolic pathways |
| Q6P1J6 | 151056 | hsa04977 | Vitamin digestion and absorption |
| Q8N1Q1 | 377677 | hsa00910 | Nitrogen metabolism |
| Q92731 | 2100 | hsa01522 | Endocrine resistance |
| Q92731 | 2100 | hsa04915 | Estrogen signaling pathway |
| Q92731 | 2100 | hsa04917 | Prolactin signaling pathway |
| Q92731 | 2100 | hsa05200 | Pathways in cancer |
| Q92731 | 2100 | hsa05224 | Breast cancer |
| Q92887 | 1244 | hsa01523 | Antifolate resistance |
| Q92887 | 1244 | hsa01524 | Platinum drug resistance |
| Q92887 | 1244 | hsa02010 | ABC transporters |
| Q92887 | 1244 | hsa04976 | Bile secretion |
| Q9ULX7 | 23632 | hsa00910 | Nitrogen metabolism |
| Q9Y2D0 | 11238 | hsa00910 | Nitrogen metabolism |
| O43741 | 5565 | hsa04068 | FoxO signaling pathway |
| O43741 | 5565 | hsa04152 | AMPK signaling pathway |
| O43741 | 5565 | hsa04211 | Longevity regulating pathway |
| O43741 | 5565 | hsa04213 | Longevity regulating pathway - multiple species |
| O43741 | 5565 | hsa04371 | Apelin signaling pathway |
| O43741 | 5565 | hsa04530 | Tight junction |
| O43741 | 5565 | hsa04710 | Circadian rhythm |
| O43741 | 5565 | hsa04714 | Thermogenesis |
| O43741 | 5565 | hsa04910 | Insulin signaling pathway |
| O43741 | 5565 | hsa04920 | Adipocytokine signaling pathway |
| O43741 | 5565 | hsa04921 | Oxytocin signaling pathway |
| O43741 | 5565 | hsa04922 | Glucagon signaling pathway |
| O43741 | 5565 | hsa04931 | Insulin resistance |
| O43741 | 5565 | hsa04932 | Non-alcoholic fatty liver disease (NAFLD) |
| O43741 | 5565 | hsa05410 | Hypertrophic cardiomyopathy (HCM) |
| P02747 | 714 | hsa04610 | Complement and coagulation cascades |
| P02747 | 714 | hsa05020 | Prion diseases |
| P02747 | 714 | hsa05133 | Pertussis |
| P02747 | 714 | hsa05142 | Chagas disease (American trypanosomiasis) |
| P02747 | 714 | hsa05150 | Staphylococcus aureus infection |
| P02747 | 714 | hsa05322 | Systemic lupus erythematosus |
| P04150 | 2908 | hsa04080 | Neuroactive ligand-receptor interaction |
| P05164 | 4353 | hsa00983 | Drug metabolism - other enzymes |
| P05164 | 4353 | hsa04145 | Phagosome |
| P05164 | 4353 | hsa05202 | Transcriptional misregulation in cancer |
| P05164 | 4353 | hsa05221 | Acute myeloid leukemia |
| P06401 | 5241 | hsa04114 | Oocyte meiosis |
| P06401 | 5241 | hsa04914 | Progesterone-mediated oocyte maturation |
| P06401 | 5241 | hsa04915 | Estrogen signaling pathway |
| P06401 | 5241 | hsa05224 | Breast cancer |
| P09210 | 2939 | hsa00480 | Glutathione metabolism |
| P09210 | 2939 | hsa00980 | Metabolism of xenobiotics by cytochrome P450 |
| P09210 | 2939 | hsa00982 | Drug metabolism - cytochrome P450 |
| P09210 | 2939 | hsa00983 | Drug metabolism - other enzymes |
| P09210 | 2939 | hsa01524 | Platinum drug resistance |
| P09210 | 2939 | hsa05200 | Pathways in cancer |
| P09210 | 2939 | hsa05204 | Chemical carcinogenesis |
| P09210 | 2939 | hsa05225 | Hepatocellular carcinoma |
| P09210 | 2939 | hsa05418 | Fluid shear stress and atherosclerosis |
| P10275 | 367 | hsa04114 | Oocyte meiosis |
| P10275 | 367 | hsa05200 | Pathways in cancer |
| P10275 | 367 | hsa05215 | Prostate cancer |
| P10276 | 5914 | hsa04659 | Th17 cell differentiation |
| P10276 | 5914 | hsa04915 | Estrogen signaling pathway |
| P10276 | 5914 | hsa05200 | Pathways in cancer |
| P10276 | 5914 | hsa05202 | Transcriptional misregulation in cancer |
| P10276 | 5914 | hsa05221 | Acute myeloid leukemia |
| P10826 | 5915 | hsa05200 | Pathways in cancer |
| P10826 | 5915 | hsa05222 | Small cell lung cancer |
| P10826 | 5915 | hsa05223 | Non-small cell lung cancer |
| P10826 | 5915 | hsa05226 | Gastric cancer |
| P12104 | 2169 | hsa03320 | PPAR signaling pathway |
| P12104 | 2169 | hsa04975 | Fat digestion and absorption |
| P14555 | 5320 | hsa00564 | Glycerophospholipid metabolism |
| P14555 | 5320 | hsa00565 | Ether lipid metabolism |
| P14555 | 5320 | hsa00590 | Arachidonic acid metabolism |
| P14555 | 5320 | hsa00591 | Linoleic acid metabolism |
| P14555 | 5320 | hsa00592 | alpha-Linolenic acid metabolism |
| P14555 | 5320 | hsa01100 | Metabolic pathways |
| P14555 | 5320 | hsa04014 | Ras signaling pathway |
| P14555 | 5320 | hsa04270 | Vascular smooth muscle contraction |
| P14555 | 5320 | hsa04972 | Pancreatic secretion |
| P14555 | 5320 | hsa04975 | Fat digestion and absorption |
| P28845 | 3290 | hsa00140 | Steroid hormone biosynthesis |
| P28845 | 3290 | hsa00980 | Metabolism of xenobiotics by cytochrome P450 |
| P28845 | 3290 | hsa01100 | Metabolic pathways |
| P28845 | 3290 | hsa05204 | Chemical carcinogenesis |
| P35367 | 3269 | hsa04020 | Calcium signaling pathway |
| P35367 | 3269 | hsa04080 | Neuroactive ligand-receptor interaction |
| P35367 | 3269 | hsa04750 | Inflammatory mediator regulation of TRP channels |
| P37231 | 5468 | hsa03320 | PPAR signaling pathway |
| P37231 | 5468 | hsa04152 | AMPK signaling pathway |
| P37231 | 5468 | hsa04211 | Longevity regulating pathway |
| P37231 | 5468 | hsa04380 | Osteoclast differentiation |
| P37231 | 5468 | hsa04714 | Thermogenesis |
| P37231 | 5468 | hsa05016 | Huntington disease |
| P37231 | 5468 | hsa05200 | Pathways in cancer |
| P37231 | 5468 | hsa05202 | Transcriptional misregulation in cancer |
| P37231 | 5468 | hsa05216 | Thyroid cancer |
| P51580 | 7172 | hsa00983 | Drug metabolism - other enzymes |
| Q07869 | 5465 | hsa03320 | PPAR signaling pathway |
| Q07869 | 5465 | hsa04024 | cAMP signaling pathway |
| Q07869 | 5465 | hsa04920 | Adipocytokine signaling pathway |
| Q07869 | 5465 | hsa04922 | Glucagon signaling pathway |
| Q07869 | 5465 | hsa04931 | Insulin resistance |
| Q07869 | 5465 | hsa04932 | Non-alcoholic fatty liver disease (NAFLD) |
| Q07869 | 5465 | hsa05160 | Hepatitis C |

**Supplementary Table S4** Network topological parameters of TPN

| **Pathway** | **Degree centrality** | **Betweenness centrality** | **Closeness centrality** |
| --- | --- | --- | --- |
| hsa01100 | 19 | 0.18798299 | 0.31746032 |
| hsa05200 | 18 | 0.12650172 | 0.36553525 |
| hsa04080 | 13 | 0.03855147 | 0.24647887 |
| hsa00910 | 12 | 0.07123806 | 0.20588235 |
| hsa04915 | 11 | 0.03844984 | 0.34567901 |
| hsa05418 | 10 | 0.01768946 | 0.28629857 |
| hsa05206 | 8 | 0.03186583 | 0.31250000 |
| hsa04020 | 7 | 0.02303251 | 0.32941176 |
| hsa04022 | 7 | 0.01502908 | 0.26119403 |
| hsa04151 | 7 | 0.01822555 | 0.29350105 |
| hsa04726 | 7 | 0.02763004 | 0.31111111 |
| hsa05215 | 7 | 0.00767779 | 0.27290448 |
| hsa00590 | 6 | 0.00909243 | 0.26974952 |
| hsa00983 | 6 | 0.01561949 | 0.24390244 |
| hsa01522 | 6 | 0.01306800 | 0.31602709 |
| hsa04723 | 6 | 0.01585435 | 0.31180401 |
| hsa04926 | 6 | 0.01534986 | 0.33096927 |
| hsa00982 | 5 | 0.00523432 | 0.24822695 |
| hsa01524 | 5 | 0.01203620 | 0.26022305 |
| hsa04024 | 5 | 0.00863596 | 0.29106029 |
| hsa04261 | 5 | 0.01213514 | 0.30567686 |
| hsa04657 | 5 | 0.00377479 | 0.26515152 |
| hsa04727 | 5 | 0.01253052 | 0.30701754 |
| hsa04728 | 5 | 0.01144450 | 0.30769231 |
| hsa04921 | 5 | 0.01882105 | 0.33254157 |
| hsa04923 | 5 | 0.00975924 | 0.30973451 |
| hsa05030 | 5 | 0.01144450 | 0.30769231 |
| hsa05031 | 5 | 0.01144450 | 0.30769231 |
| hsa05202 | 5 | 0.01071563 | 0.24096386 |
| hsa05204 | 5 | 0.00535532 | 0.26022305 |
| hsa05205 | 5 | 0.01229075 | 0.30769231 |
| hsa05225 | 5 | 0.00670957 | 0.27343750 |
| hsa00980 | 4 | 0.00161697 | 0.24054983 |
| hsa03320 | 4 | 0.00651751 | 0.23411371 |
| hsa04066 | 4 | 0.01771337 | 0.28340081 |
| hsa04371 | 4 | 0.00724074 | 0.30701754 |
| hsa04714 | 4 | 0.00968338 | 0.28806584 |
| hsa04742 | 4 | 0.00459086 | 0.28513238 |
| hsa04912 | 4 | 0.00545440 | 0.30107527 |
| hsa04914 | 4 | 0.00555605 | 0.28571429 |
| hsa04922 | 4 | 0.00719309 | 0.28513238 |
| hsa04928 | 4 | 0.00893706 | 0.30973451 |
| hsa04931 | 4 | 0.00549440 | 0.25925926 |
| hsa04933 | 4 | 0.00342284 | 0.27613412 |
| hsa04970 | 4 | 0.00302498 | 0.28571429 |
| hsa04972 | 4 | 0.02730240 | 0.24734982 |
| hsa05032 | 4 | 0.00459086 | 0.28513238 |
| hsa05033 | 4 | 0.00030347 | 0.21604938 |
| hsa05034 | 4 | 0.00800151 | 0.29914530 |
| hsa05165 | 4 | 0.01994374 | 0.32558140 |
| hsa05219 | 4 | 0.00178333 | 0.25454545 |
| hsa05222 | 4 | 0.00606938 | 0.28806584 |
| hsa00051 | 3 | 0.00014764 | 0.19662921 |
| hsa00052 | 3 | 0.00021932 | 0.19690577 |
| hsa00330 | 3 | 0.00202180 | 0.25500911 |
| hsa00480 | 3 | 0.00000853 | 0.22328549 |
| hsa00790 | 3 | 0.00014764 | 0.19662921 |
| hsa04014 | 3 | 0.02092750 | 0.32258065 |
| hsa04064 | 3 | 0.00408603 | 0.27667984 |
| hsa04068 | 3 | 0.00497677 | 0.27667984 |
| hsa04114 | 3 | 0.00264028 | 0.28000000 |
| hsa04141 | 3 | 0.00039904 | 0.24390244 |
| hsa04152 | 3 | 0.00382706 | 0.24432810 |
| hsa04211 | 3 | 0.00692102 | 0.28747433 |
| hsa04217 | 3 | 0.00039904 | 0.24390244 |
| hsa04270 | 3 | 0.01172790 | 0.30701754 |
| hsa04510 | 3 | 0.00525562 | 0.26666667 |
| hsa04540 | 3 | 0.00531957 | 0.30501089 |
| hsa04610 | 3 | 0.01089573 | 0.21772939 |
| hsa04611 | 3 | 0.00422433 | 0.30368764 |
| hsa04621 | 3 | 0.00039904 | 0.24390244 |
| hsa04630 | 3 | 0.00167362 | 0.26217228 |
| hsa04659 | 3 | 0.00020503 | 0.22400000 |
| hsa04670 | 3 | 0.00224367 | 0.23569024 |
| hsa04724 | 3 | 0.00727289 | 0.30701754 |
| hsa04910 | 3 | 0.00558714 | 0.28340081 |
| hsa04913 | 3 | 0.00653433 | 0.30303030 |
| hsa04924 | 3 | 0.00171761 | 0.28455285 |
| hsa04964 | 3 | 0.01893682 | 0.24734982 |
| hsa04974 | 3 | 0.00752670 | 0.18087855 |
| hsa04976 | 3 | 0.04729186 | 0.29227557 |
| hsa05020 | 3 | 0.03431189 | 0.28282828 |
| hsa05163 | 3 | 0.00678719 | 0.31963470 |
| hsa05224 | 3 | 0.00117236 | 0.25000000 |
| hsa05226 | 3 | 0.00204817 | 0.26266417 |
| hsa05414 | 3 | 0.01097589 | 0.29166667 |
| hsa00040 | 2 | 0.00000427 | 0.19607843 |
| hsa00220 | 2 | 0.00107408 | 0.26119403 |
| hsa00260 | 2 | 0.00000197 | 0.22012579 |
| hsa00340 | 2 | 0.00000197 | 0.22012579 |
| hsa00350 | 2 | 0.00000197 | 0.22012579 |
| hsa00360 | 2 | 0.00000197 | 0.22012579 |
| hsa00380 | 2 | 0.00000197 | 0.22012579 |
| hsa00561 | 2 | 0.00000427 | 0.19607843 |
| hsa00564 | 2 | 0.00032027 | 0.23140496 |
| hsa00565 | 2 | 0.00032027 | 0.23140496 |
| hsa00591 | 2 | 0.00032027 | 0.23140496 |
| hsa00592 | 2 | 0.00032027 | 0.23140496 |
| hsa00860 | 2 | 0.00714286 | 0.23850085 |
| hsa01521 | 2 | 0.00072026 | 0.26168224 |
| hsa04010 | 2 | 0.00284661 | 0.29787234 |
| hsa04071 | 2 | 0.00121510 | 0.26923077 |
| hsa04140 | 2 | 0.00317116 | 0.29661017 |
| hsa04210 | 2 | 0.00035554 | 0.24179620 |
| hsa04213 | 2 | 0.00191654 | 0.28225806 |
| hsa04340 | 2 | 0.00317116 | 0.29661017 |
| hsa04370 | 2 | 0.00045062 | 0.26315789 |
| hsa04520 | 2 | 0.00189759 | 0.24911032 |
| hsa04530 | 2 | 0.00191654 | 0.28225806 |
| hsa04612 | 2 | 0.00000213 | 0.22222222 |
| hsa04668 | 2 | 0.00048159 | 0.25830258 |
| hsa04713 | 2 | 0.00137976 | 0.28513238 |
| hsa04720 | 2 | 0.00137976 | 0.28513238 |
| hsa04725 | 2 | 0.00317116 | 0.29661017 |
| hsa04750 | 2 | 0.00185872 | 0.28340081 |
| hsa04810 | 2 | 0.00205465 | 0.25225225 |
| hsa04911 | 2 | 0.00201071 | 0.27833002 |
| hsa04920 | 2 | 0.00015557 | 0.21705426 |
| hsa04932 | 2 | 0.00015557 | 0.21705426 |
| hsa04934 | 2 | 0.00284661 | 0.29787234 |
| hsa04971 | 2 | 0.03299252 | 0.28985507 |
| hsa04975 | 2 | 0.00303409 | 0.23529412 |
| hsa05010 | 2 | 0.00042144 | 0.22580645 |
| hsa05012 | 2 | 0.00101116 | 0.27833002 |
| hsa05014 | 2 | 0.00380296 | 0.25782689 |
| hsa05140 | 2 | 0.00339416 | 0.25735294 |
| hsa05145 | 2 | 0.00248634 | 0.26119403 |
| hsa05160 | 2 | 0.00241001 | 0.25316456 |
| hsa05161 | 2 | 0.00027450 | 0.24561404 |
| hsa05166 | 2 | 0.00070847 | 0.27888446 |
| hsa05169 | 2 | 0.00317116 | 0.29661017 |
| hsa05210 | 2 | 0.00072026 | 0.26168224 |
| hsa05221 | 2 | 0.00093175 | 0.21943574 |
| hsa05230 | 2 | 0.00328929 | 0.27667984 |
| hsa05410 | 2 | 0.00185173 | 0.22400000 |
| hsa00010 | 1 | 0 | 0.21052632 |
| hsa00140 | 1 | 0 | 0.19746121 |
| hsa00240 | 1 | 0 | 0.19858156 |
| hsa00250 | 1 | 0 | 0.23688663 |
| hsa00471 | 1 | 0 | 0.23688663 |
| hsa00500 | 1 | 0 | 0.19525802 |
| hsa00520 | 1 | 0 | 0.19498607 |
| hsa00730 | 1 | 0 | 0.19498607 |
| hsa01200 | 1 | 0 | 0.21052632 |
| hsa01230 | 1 | 0 | 0.21052632 |
| hsa01523 | 1 | 0 | 0.19774011 |
| hsa02010 | 1 | 0 | 0.19774011 |
| hsa04012 | 1 | 0 | 0.24778761 |
| hsa04015 | 1 | 0 | 0.24778761 |
| hsa04062 | 1 | 0 | 0.27777778 |
| hsa04072 | 1 | 0 | 0.24778761 |
| hsa04115 | 1 | 0 | 0.24137931 |
| hsa04142 | 1 | 0 | 0.19525802 |
| hsa04144 | 1 | 0 | 0.24778761 |
| hsa04145 | 1 | 0 | 0.17500000 |
| hsa04215 | 1 | 0 | 0.24137931 |
| hsa04216 | 1 | 0 | 0.23809524 |
| hsa04310 | 1 | 0 | 0.27777778 |
| hsa04380 | 1 | 0 | 0.22292994 |
| hsa04512 | 1 | 0 | 0.21505376 |
| hsa04514 | 1 | 0 | 0.21505376 |
| hsa04625 | 1 | 0 | 0.25179856 |
| hsa04640 | 1 | 0 | 0.21505376 |
| hsa04664 | 1 | 0 | 0.21943574 |
| hsa04672 | 1 | 0 | 0.21505376 |
| hsa04710 | 1 | 0 | 0.21244310 |
| hsa04722 | 1 | 0 | 0.24137931 |
| hsa04730 | 1 | 0 | 0.21406728 |
| hsa04740 | 1 | 0 | 0.27777778 |
| hsa04916 | 1 | 0 | 0.27777778 |
| hsa04917 | 1 | 0 | 0.21571649 |
| hsa04918 | 1 | 0 | 0.27777778 |
| hsa04919 | 1 | 0 | 0.27777778 |
| hsa04925 | 1 | 0 | 0.27777778 |
| hsa04927 | 1 | 0 | 0.27777778 |
| hsa04961 | 1 | 0 | 0.27777778 |
| hsa04962 | 1 | 0 | 0.27777778 |
| hsa04966 | 1 | 0 | 0.20260492 |
| hsa04977 | 1 | 0 | 0.19607843 |
| hsa04978 | 1 | 0 | 0.23809524 |
| hsa05016 | 1 | 0 | 0.22292994 |
| hsa05110 | 1 | 0 | 0.27777778 |
| hsa05120 | 1 | 0 | 0.24778761 |
| hsa05133 | 1 | 0 | 0.18421053 |
| hsa05142 | 1 | 0 | 0.18421053 |
| hsa05146 | 1 | 0 | 0.27777778 |
| hsa05150 | 1 | 0 | 0.18421053 |
| hsa05152 | 1 | 0 | 0.24137931 |
| hsa05164 | 1 | 0 | 0.18041237 |
| hsa05167 | 1 | 0 | 0.25179856 |
| hsa05203 | 1 | 0 | 0.27777778 |
| hsa05212 | 1 | 0 | 0.24778761 |
| hsa05213 | 1 | 0 | 0.24778761 |
| hsa05214 | 1 | 0 | 0.24778761 |
| hsa05216 | 1 | 0 | 0.22292994 |
| hsa05218 | 1 | 0 | 0.24778761 |
| hsa05223 | 1 | 0 | 0.21244310 |
| hsa05231 | 1 | 0 | 0.24778761 |
| hsa05322 | 1 | 0 | 0.18421053 |
| hsa05323 | 1 | 0 | 0.21739130 |
| hsa05412 | 1 | 0 | 0.21505376 |
